# Supplementary material
Source: PubMed Central journal article supplement (PMC5780839)

# Supporting Information for Predicted Biological Activity of Purchasable Chemical Space

John J. Irwin+%, Garrett Gaskins+%^#\$, Teague Sterling%, Michael M. Mysinger%  
and Michael J. Keiser%^#\$

% Department of Pharmaceutical Chemistry, University of California San Francisco,  
Byers Hall, 1700 4<sup>th</sup> St, San Francisco CA 94158-2330

^ Institute for Neurodegenerative Diseases, University of California San Francisco, 675  
Nelson Rising Ln, San Francisco CA 94158

# Department of Bioengineering and Therapeutic Sciences, University of California San  
Francisco, Byers Hall, 1700 4<sup>th</sup> St, San Francisco CA 94158

\$ Institute for Computational Health Sciences, University of California San Francisco,  
550 16<sup>th</sup> St, San Francisco CA 94158

Keywords: chemical tools, ligand discovery, library design

\*Corresponding author: [jjj@cgl.ucsf.edu](mailto:jjj@cgl.ucsf.edu) 415/937-1461

+ These authors contributed equally to this work.

**Figure S1.** Performance metrics for SEA+TC on ChEMBL cross-validation sets filtered for >5 ligand annotations per target. All curves are derived from independent 5-fold cross-validation runs. Overall performance is measured by either the AUROC (A, C) or the AUPRC (B, D). **A)** ROC curves for ChEMBL cross-validation sets at a variety of threshold values. Each curve is the result of stepping the decision threshold across MaxTC values, while holding the SEA p-value decision threshold constant. Inset shows a zoomed-in version of ROC curves, with the FPR (x-axis) in log units to emphasize low-FPR behavior. **B)** Corresponding PRCs for cross-validation runs described in (A). Pink and blue circles indicate the recommended upper and lower bounds for MaxTC thresholding, respectively (MaxTC = 0.80; 0.40). **C)** Complementary ROC curves to section (A); each curve is the result of stepping across all SEA p-values, while holding the MaxTC decision threshold constant. **D)** Corresponding PRCs for cross-validation runs described in (C). Pink and blue circles indicate the recommended upper and lower bounds for the SEA p-value decision threshold, respectively (pSEA = 80; 40).

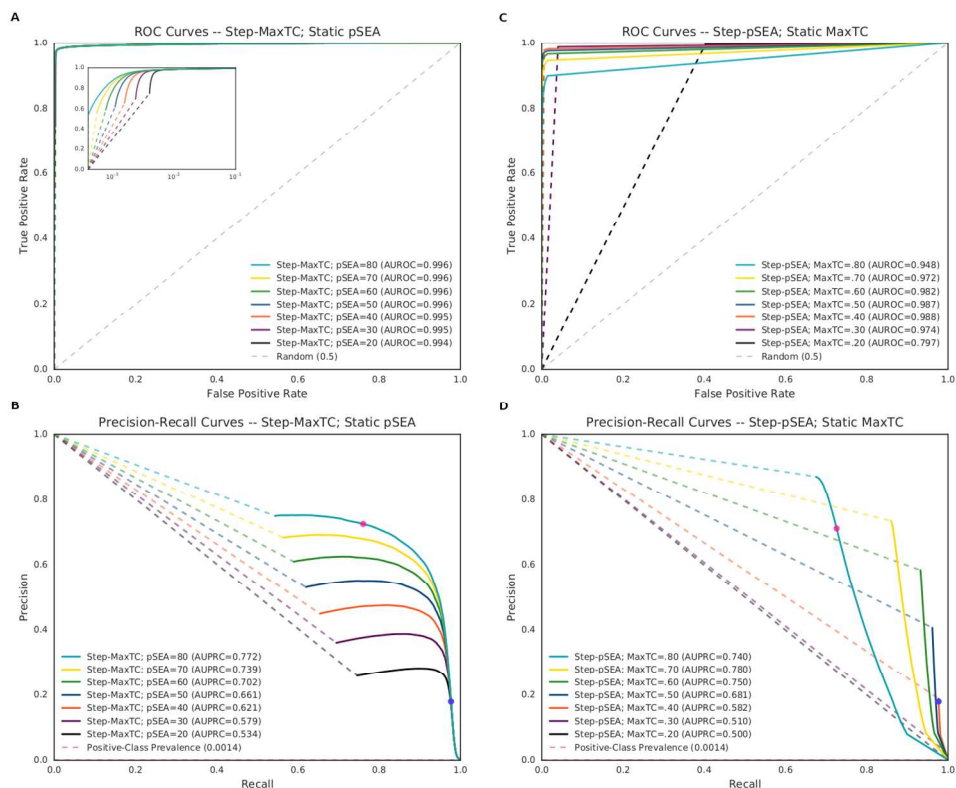

**Figure S2.** Performance metrics for SEA+TC on ChEMBL cross-validation sets filtered for >50 ligand associations per target. All analyses replicate those undertaken in **Supplementary Figure 1.**

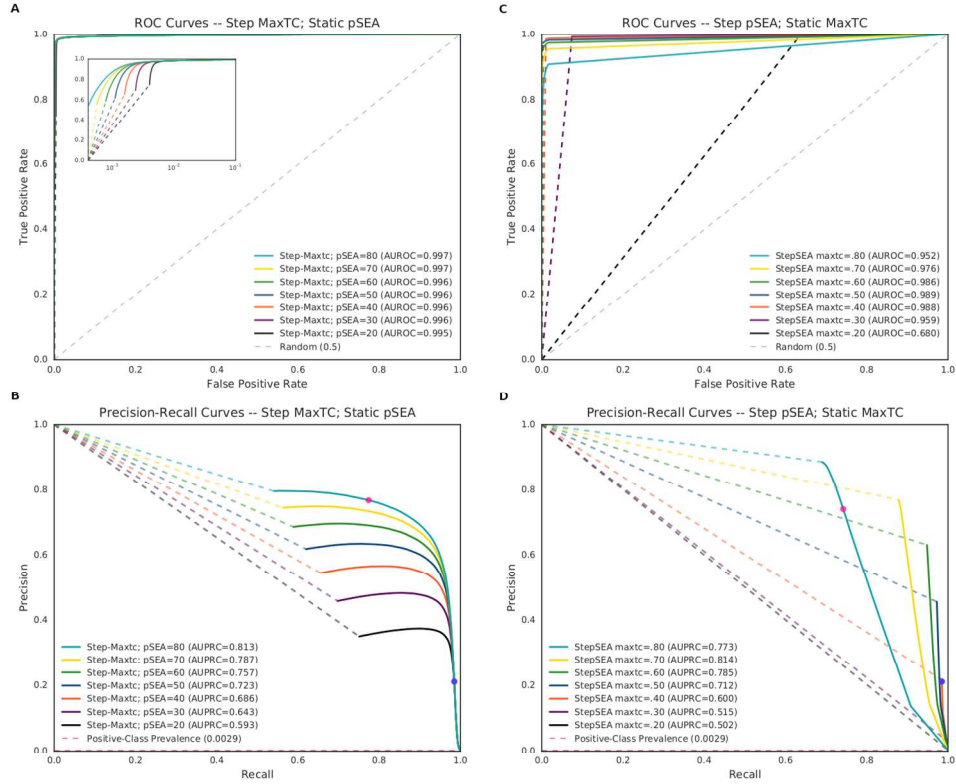

**Figure S3**

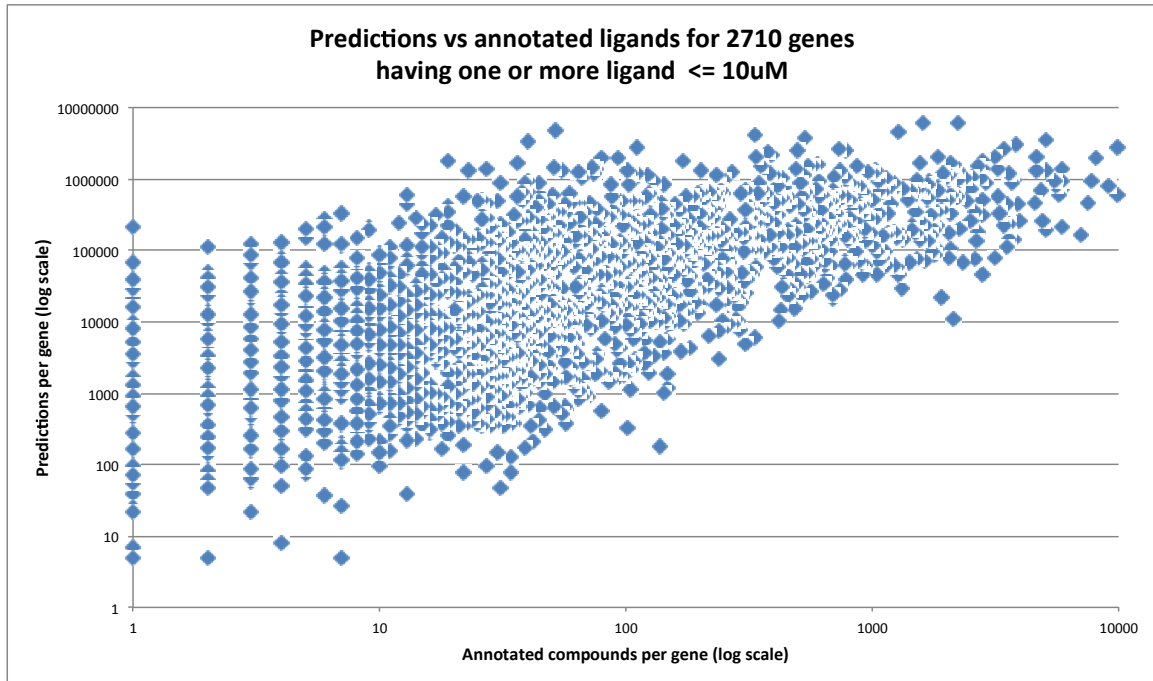

Supplement: ci7b00316_si_001.pdf [file ci7b00316_si_001.pdf]
